# Supplementary material
Source: PubMed Central journal article supplement (PMC8317428)

# Full unedited gel for Figure 3A

## LC3

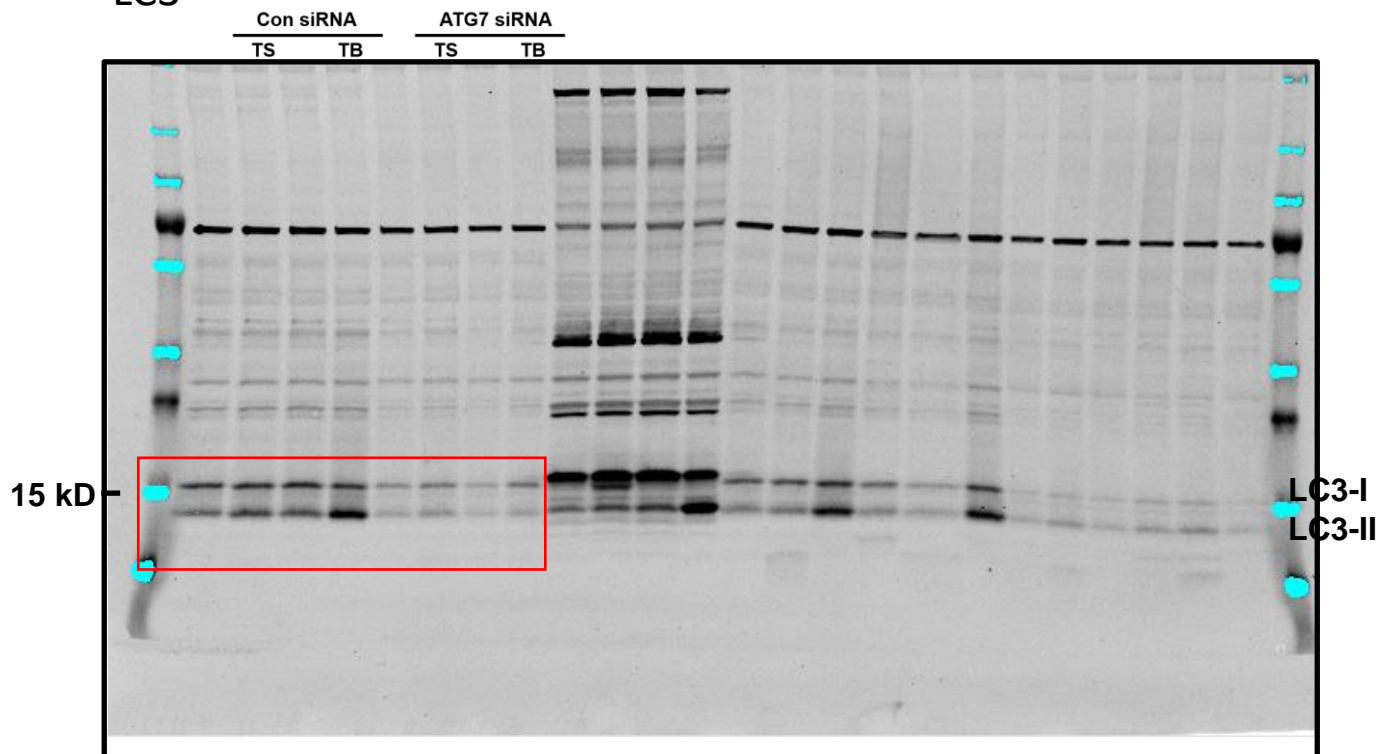

## ATG7

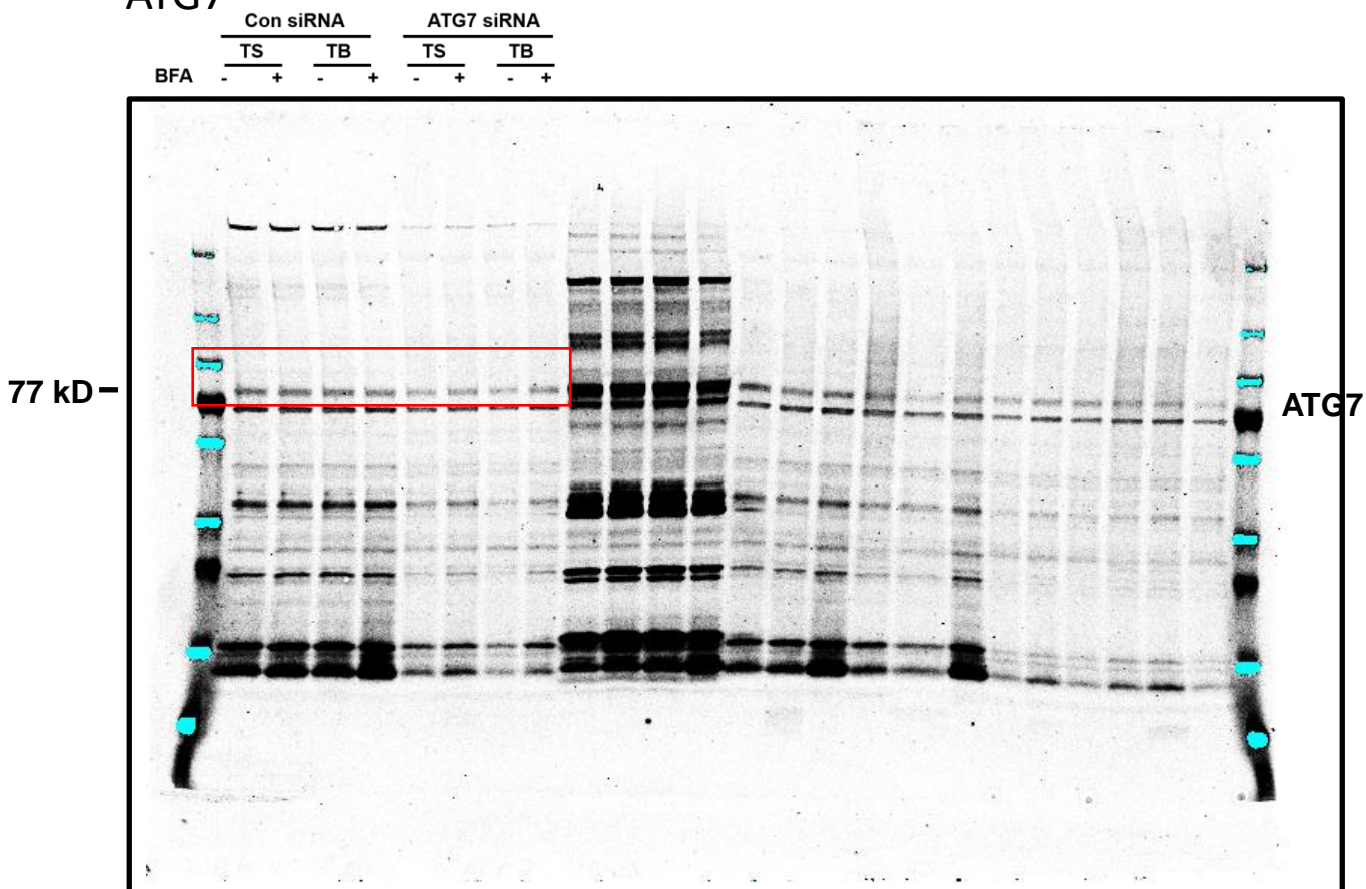

Full unedited gel for Figure 3A Continue

GAPDH

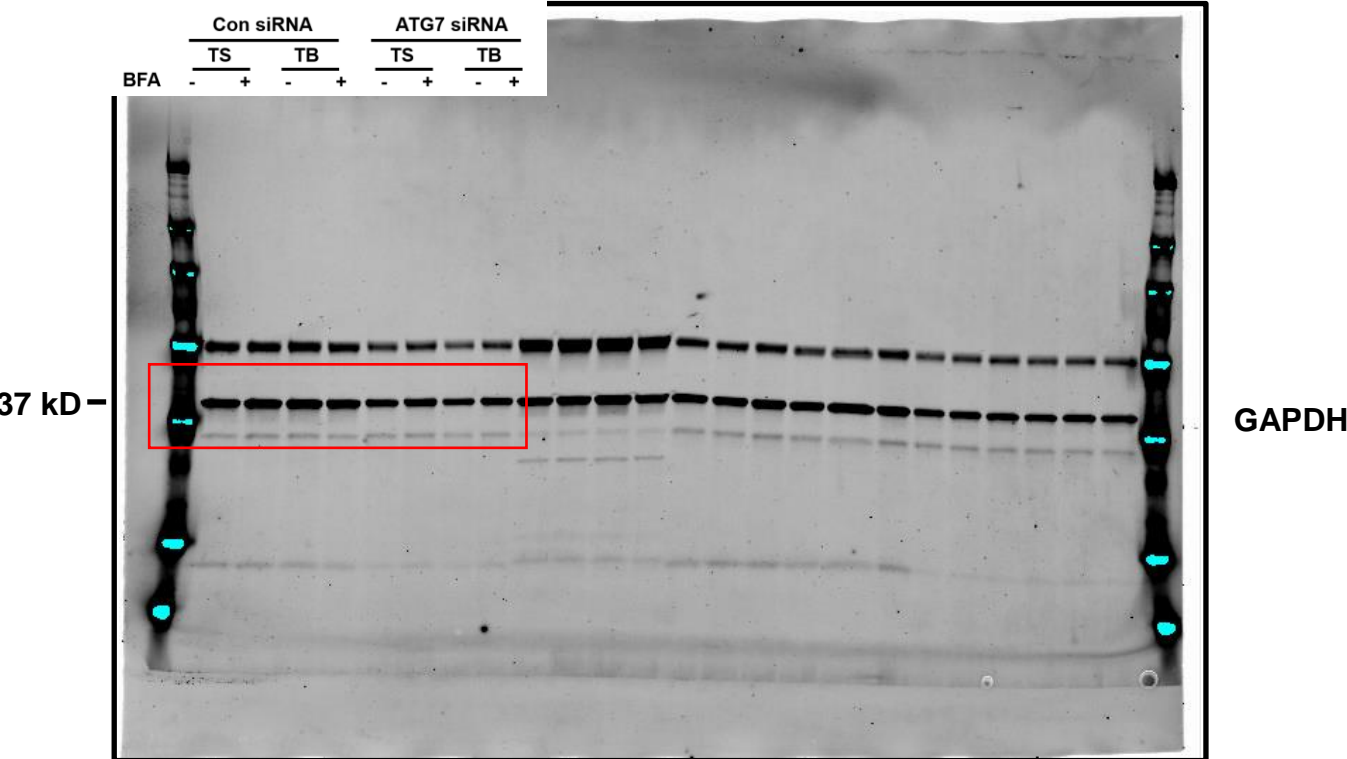

# Full unedited gel for Figure 4A

## ATG7

WT KO WT KO

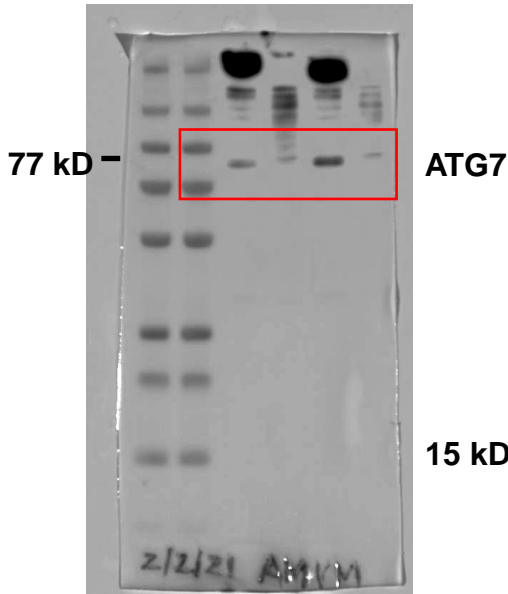

## LC3

WT KO WT KO

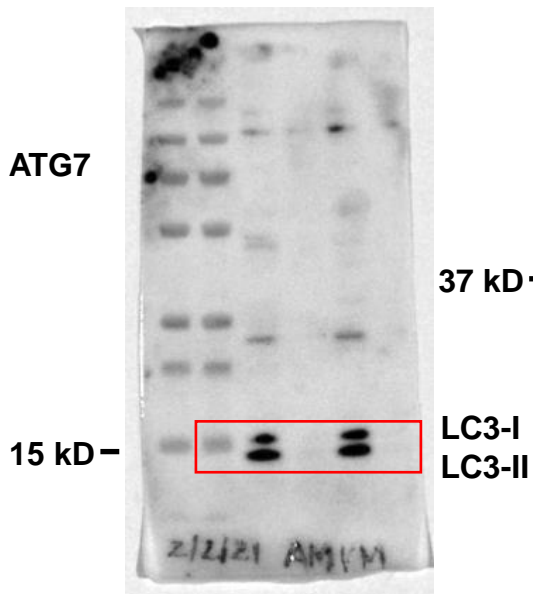

## GAPDH

WT KO WT KO

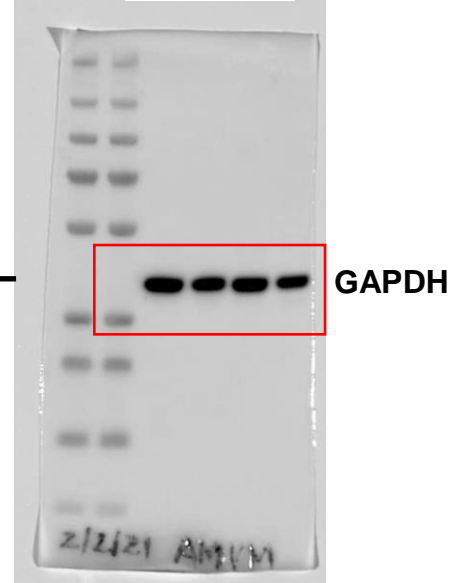

# Full unedited gel for Figure 5B

## DNPH Oxidation

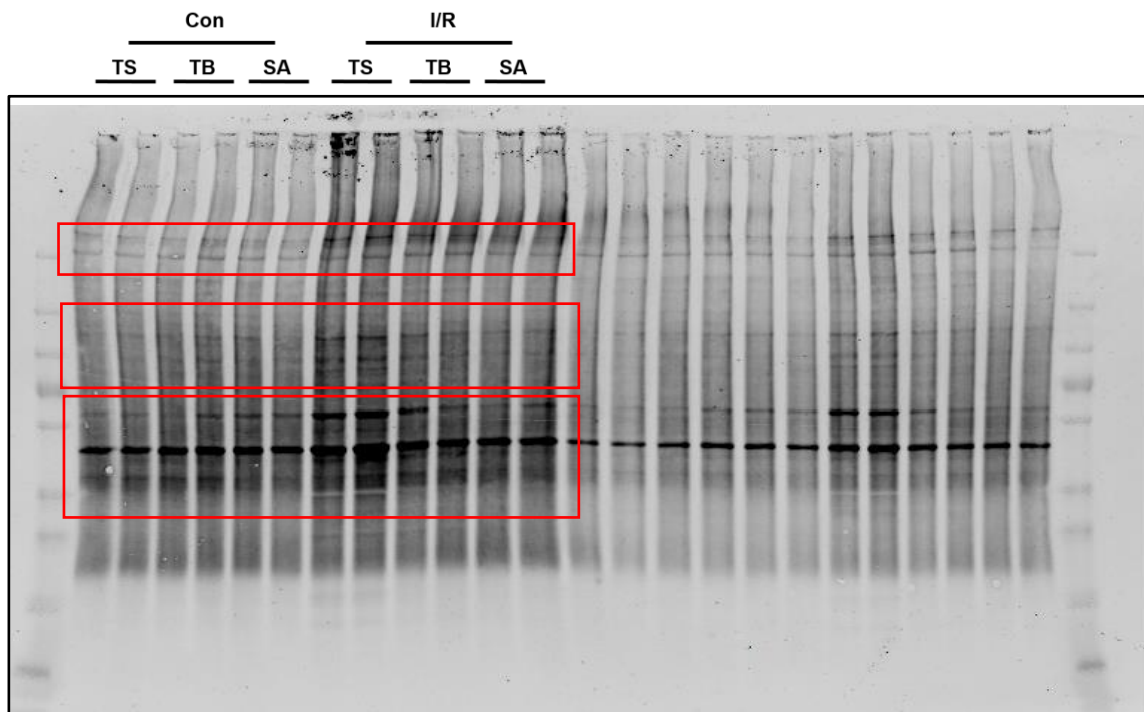

# Full unedited gel for Figure 6A

## LC3 and GAPDH

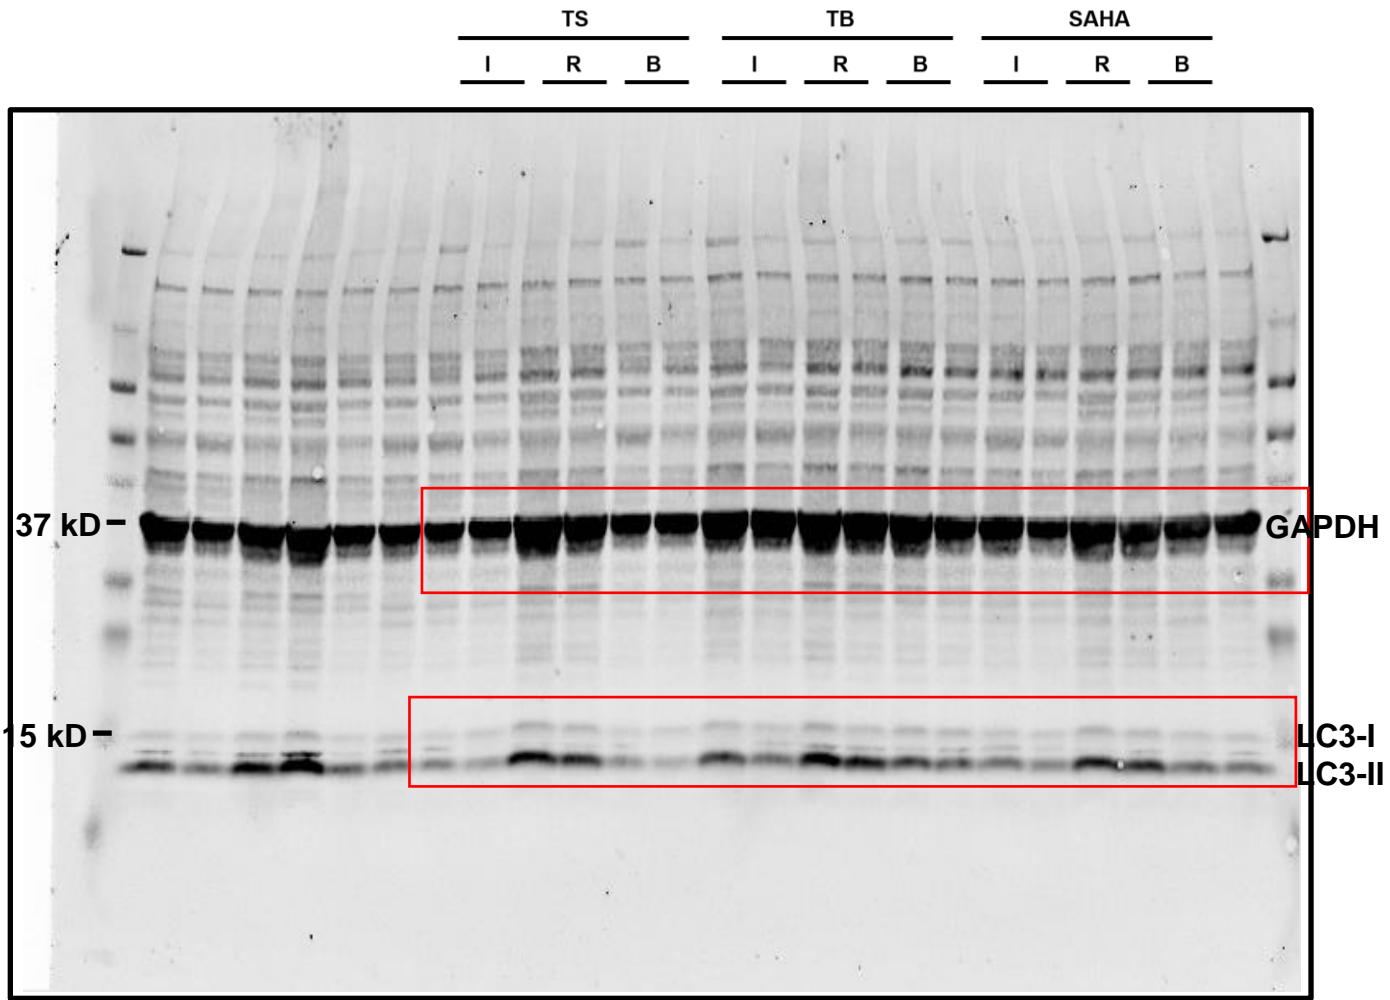

# Full unedited gel for Figure 7A

ATG7

| ATG7 <sup>fl/fl</sup> |   |   |    |   |   | ATG7 KO |   |   |    |   |   |
|-----------------------|---|---|----|---|---|---------|---|---|----|---|---|
| TS                    |   |   | TB |   |   | TS      |   |   | TB |   |   |
| I                     | R | B | I  | R | B | I       | R | B | I  | R | B |

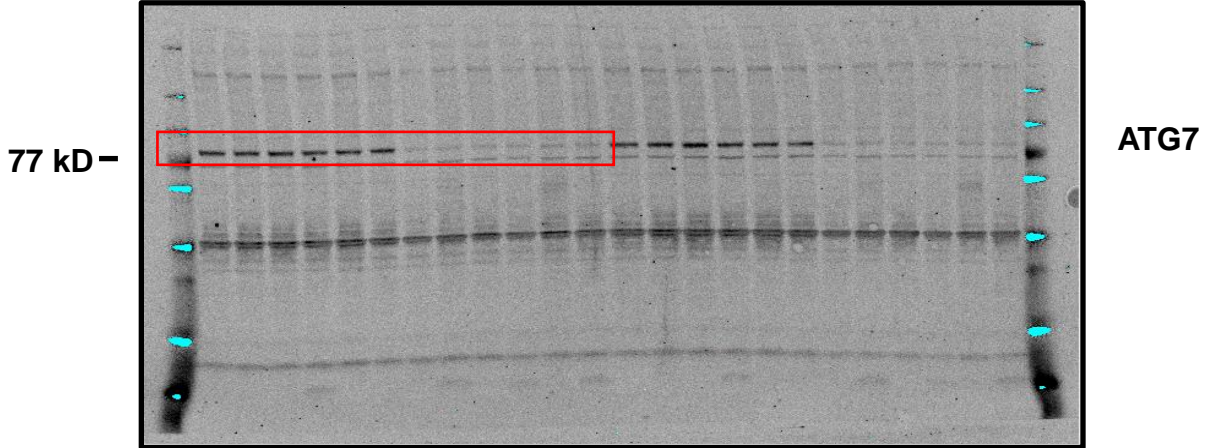

LC3

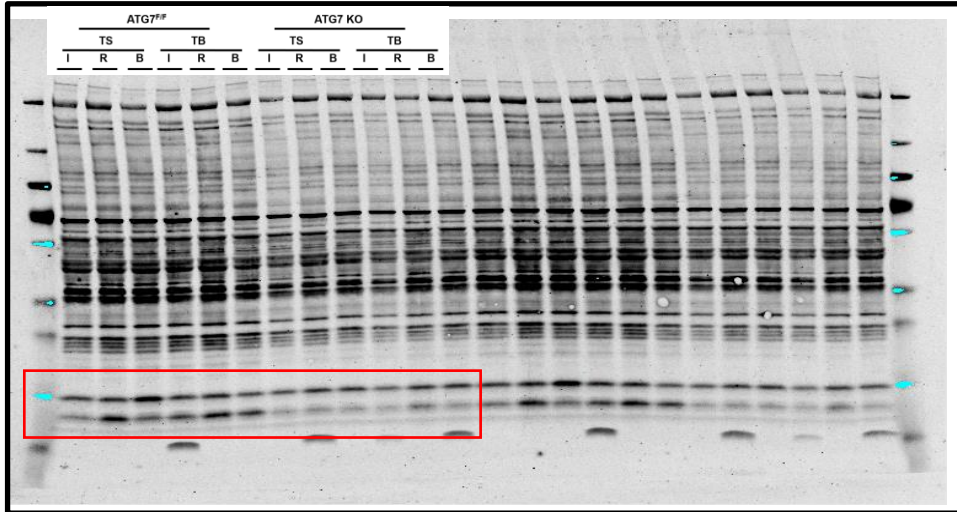

GAPDH

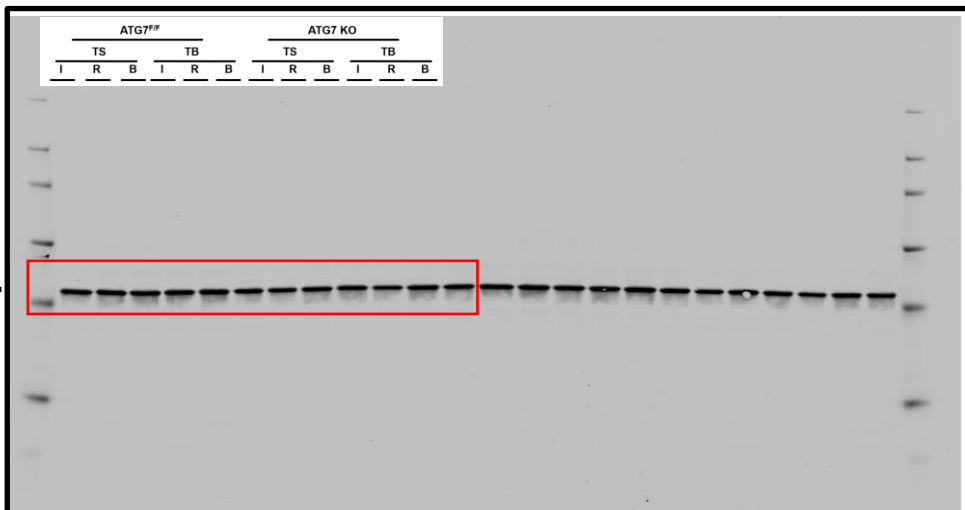

# Full unedited gel for Online Figure I

## IA LC3 and GAPDH

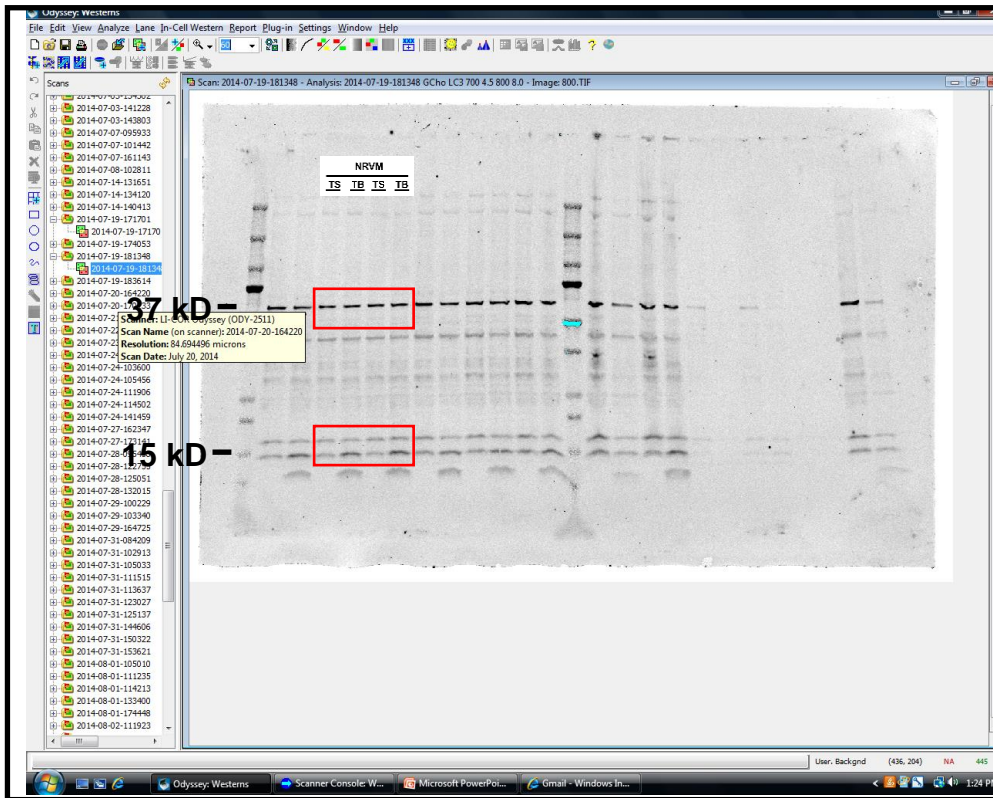

## IB LC3 and GAPDH

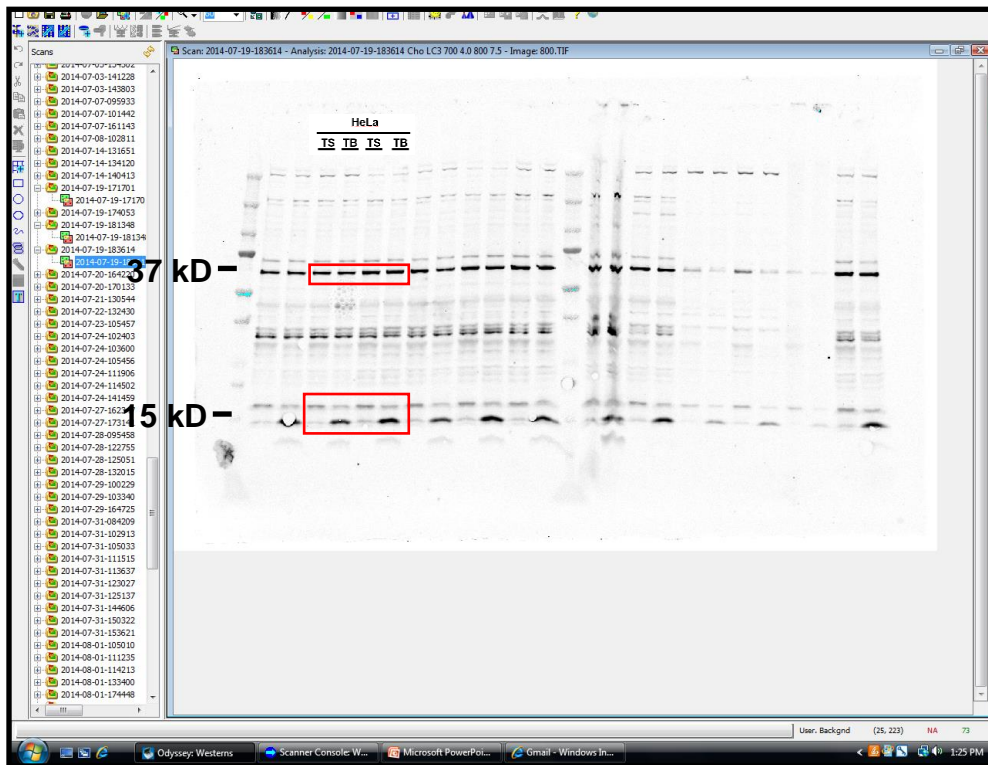

Full unedited gel for Online Figure I continue

IC HeLa LC3

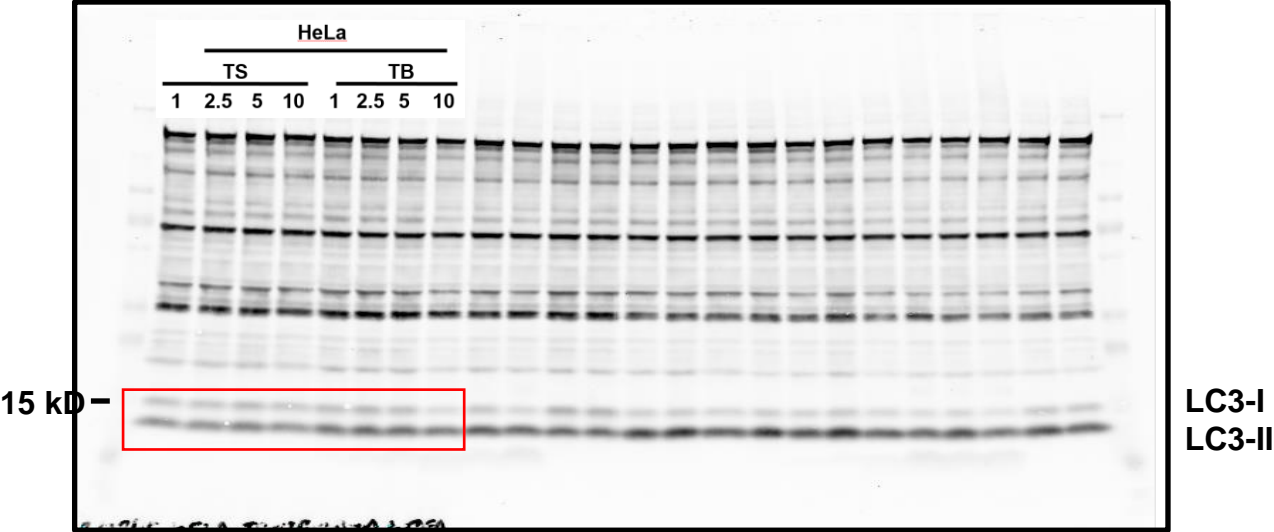

IC Hela GAPDH

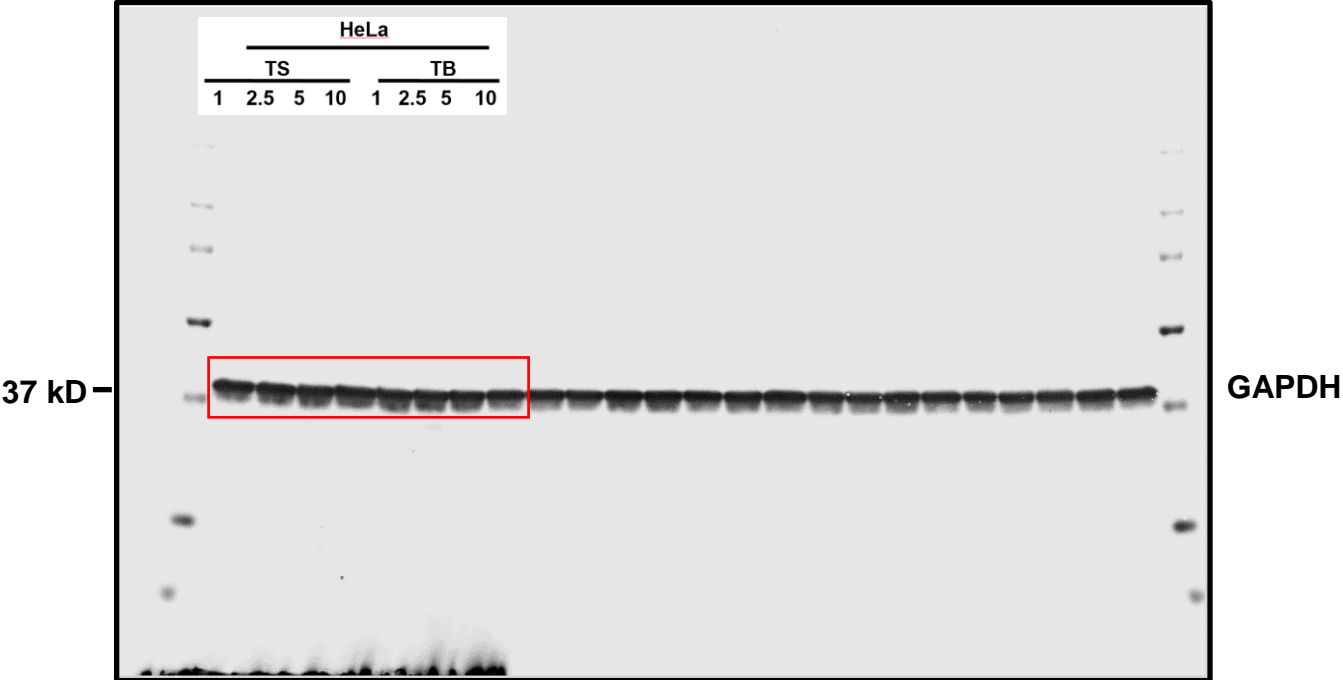



Full unedited gel for Online Figure I continue

IC ARVM LC3

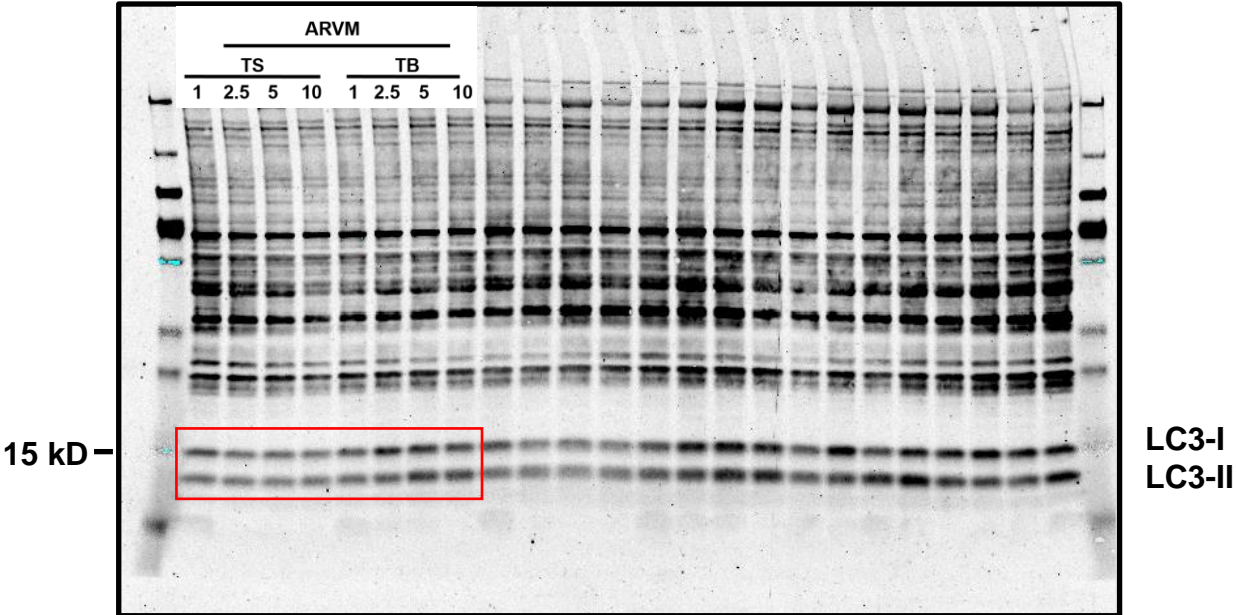

IC ARVM GAPDH

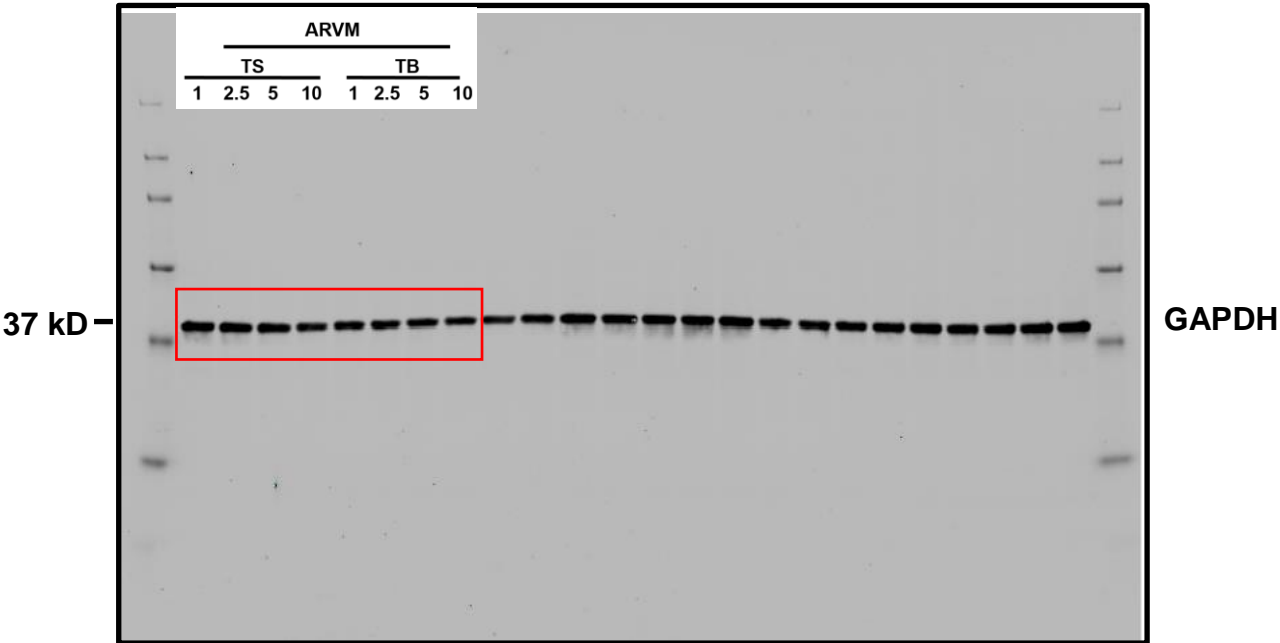

# Full unedited gel for Online Figure II

## IIA LC3

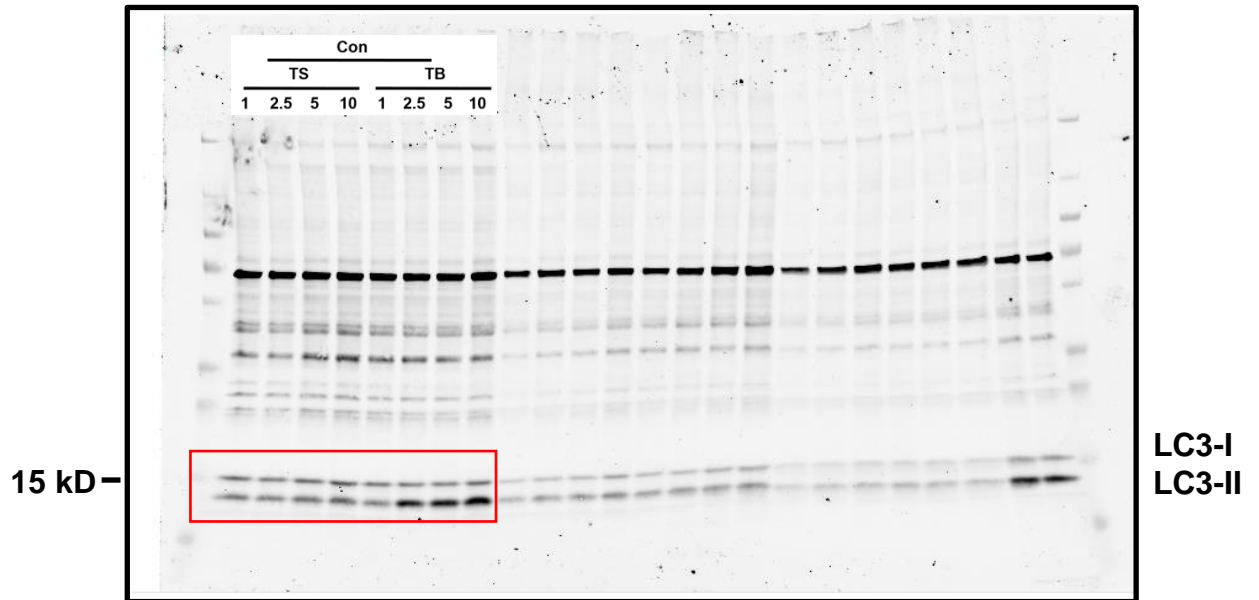

## IIA GAPDH

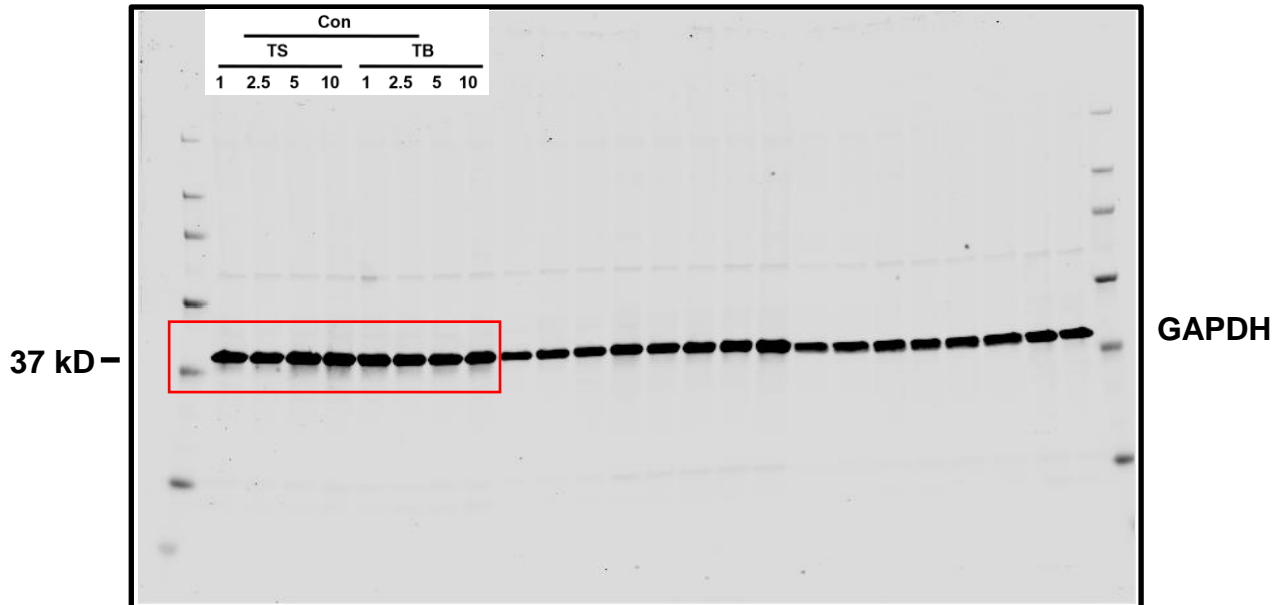

# Full unedited gel for Online Figure II Continue

## IIB LC3

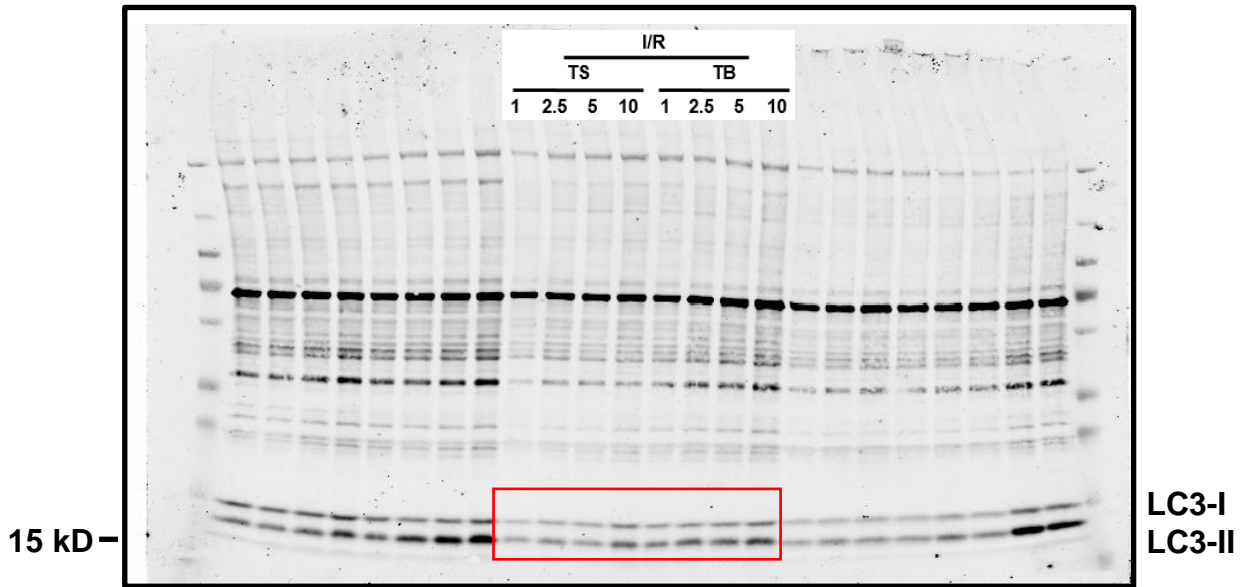

## IIB GAPDH

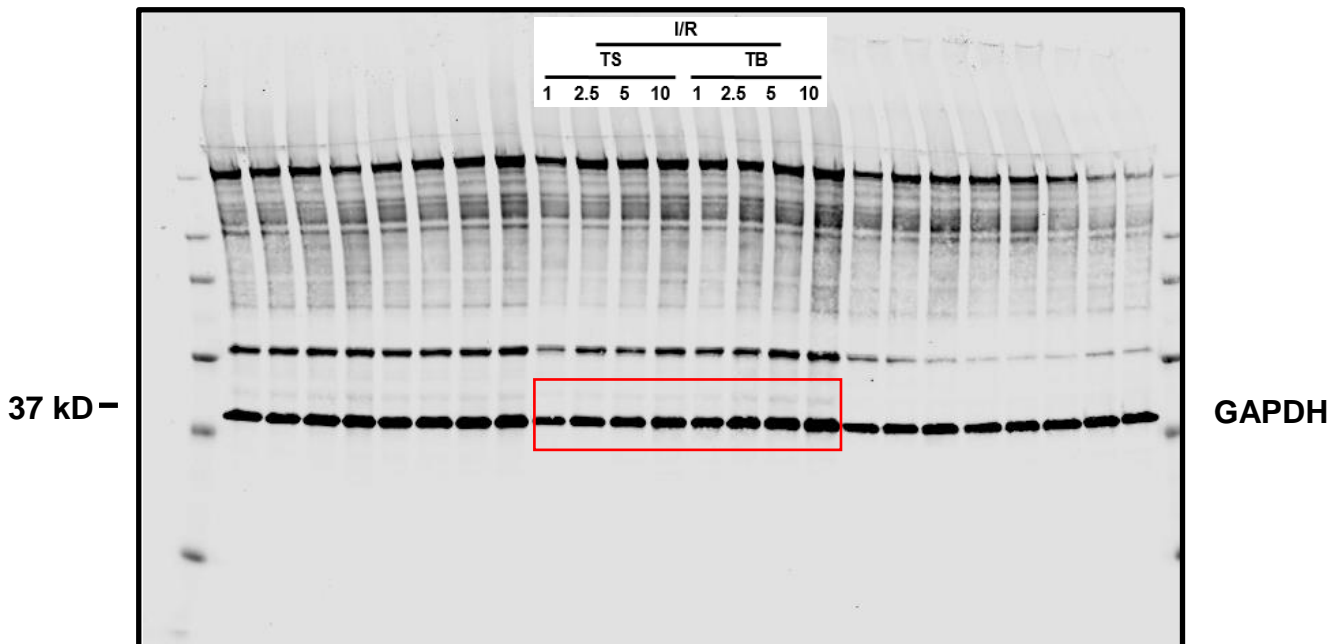

# Full unedited gel for Online Figure III

IIIA LC3

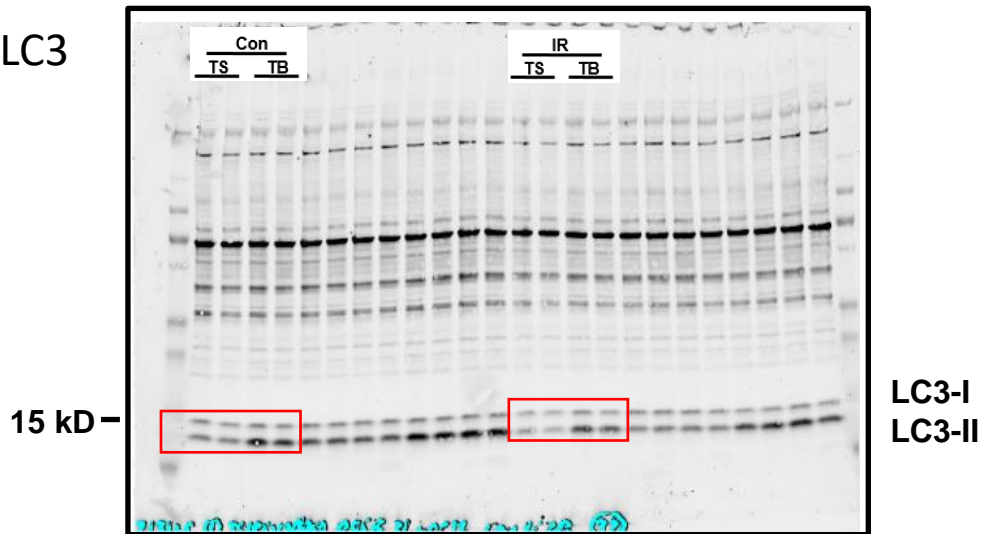

IIIA pmTOR

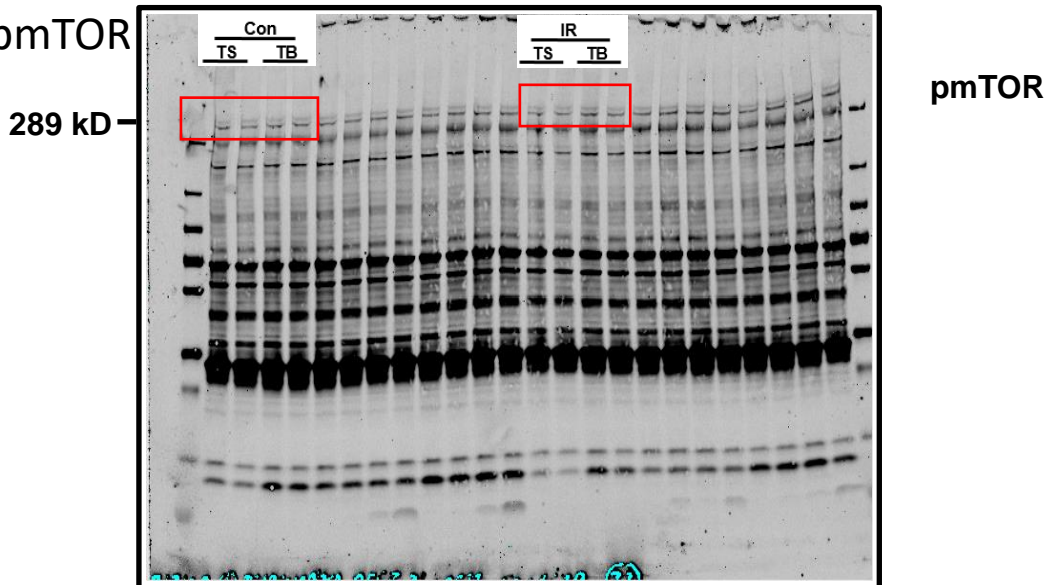

IIIA tmTOR

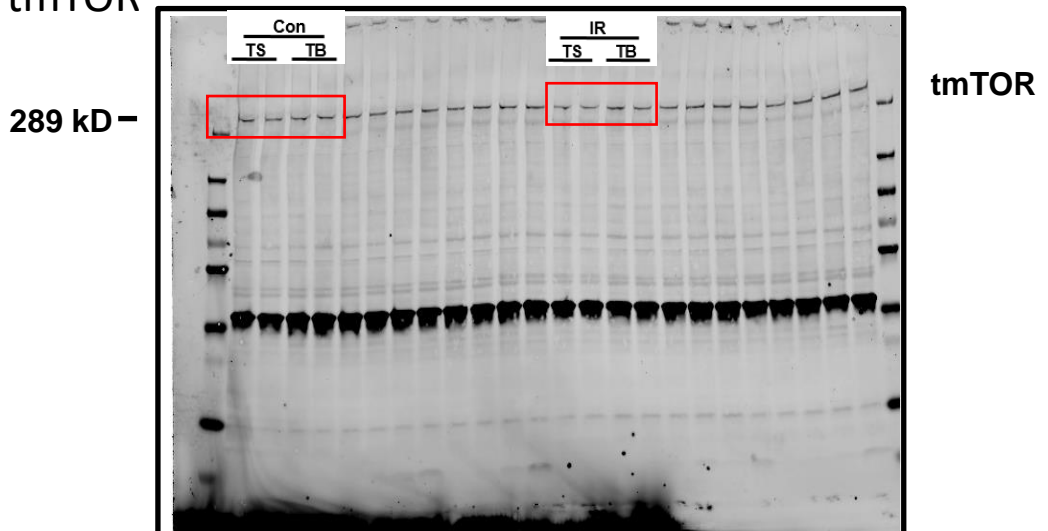

# Full unedited gel for Online Figure III Continue

IIIA pS6

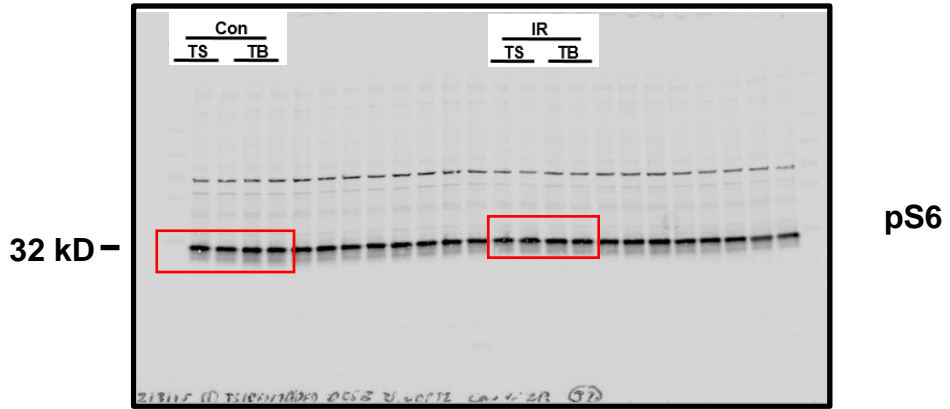

IIIA p4EBP

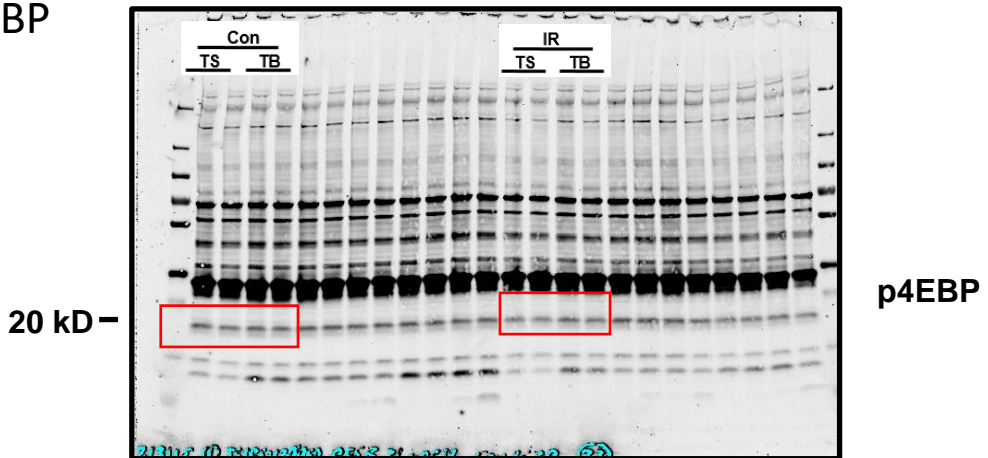

IIIA t4EBP

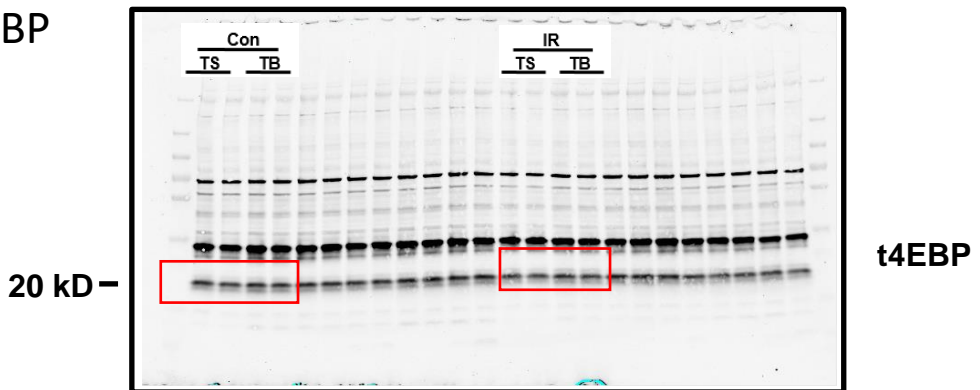

IIIA GAPDH

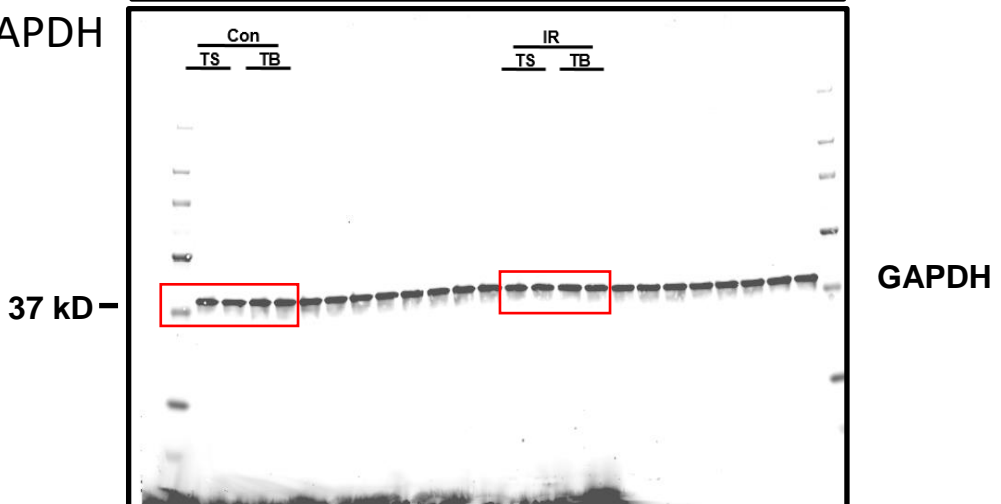

Full unedited gel for Online Figure III continue

IIIB LC3

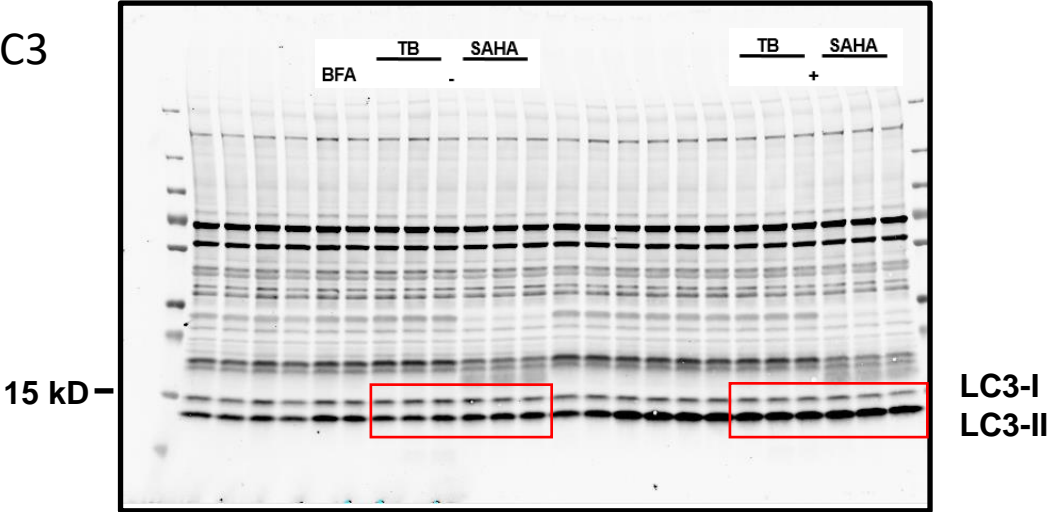

IIIB pmTOR

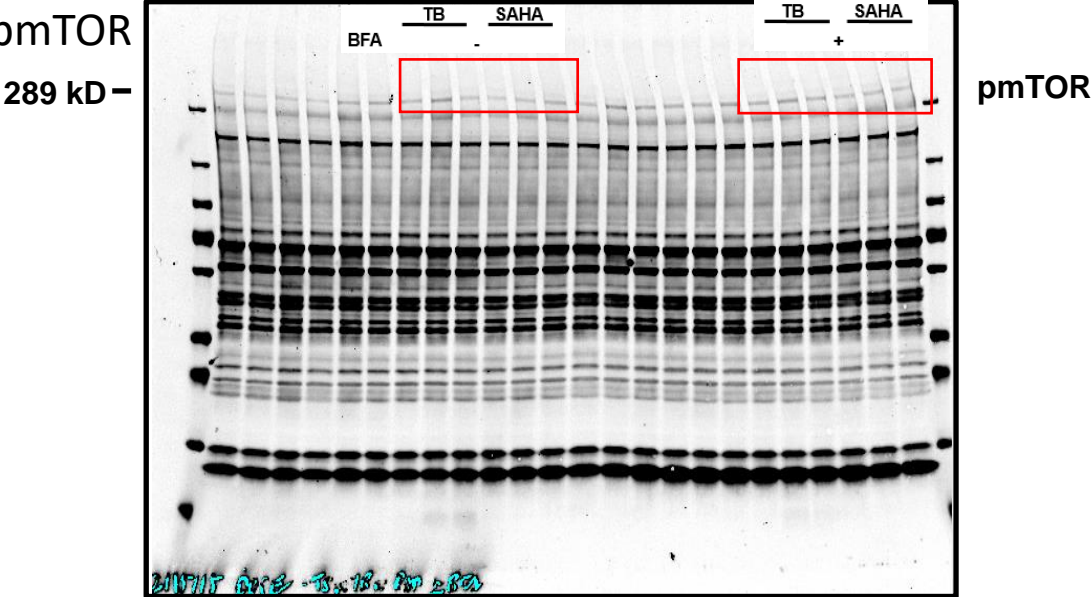

IIIB tmTOR

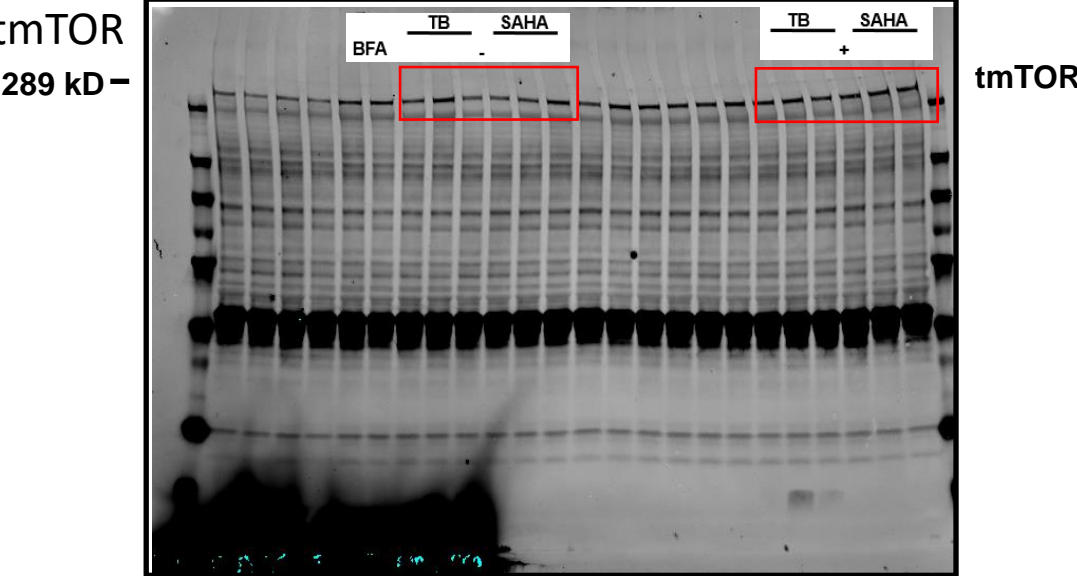

# Full unedited gel for Online Figure III continue

IIIB pS6

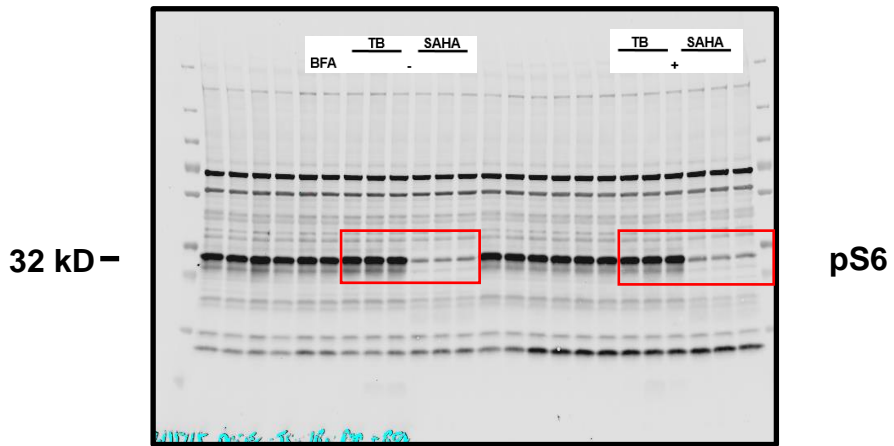

IIIB p4EBP

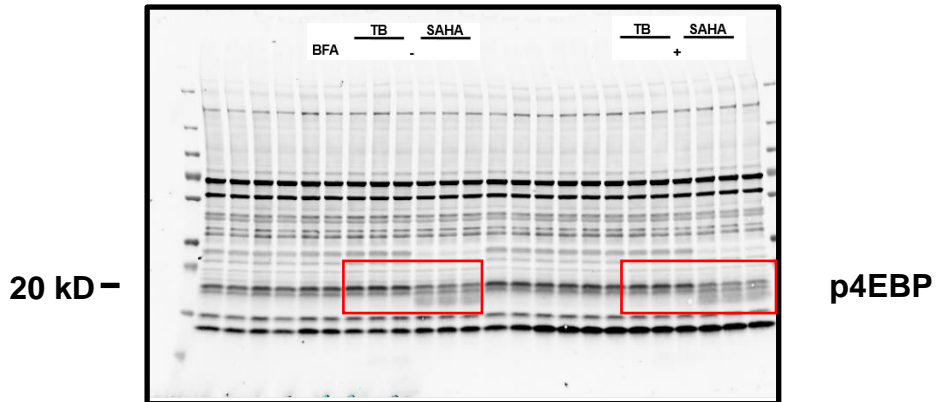

IIIB t4EBP

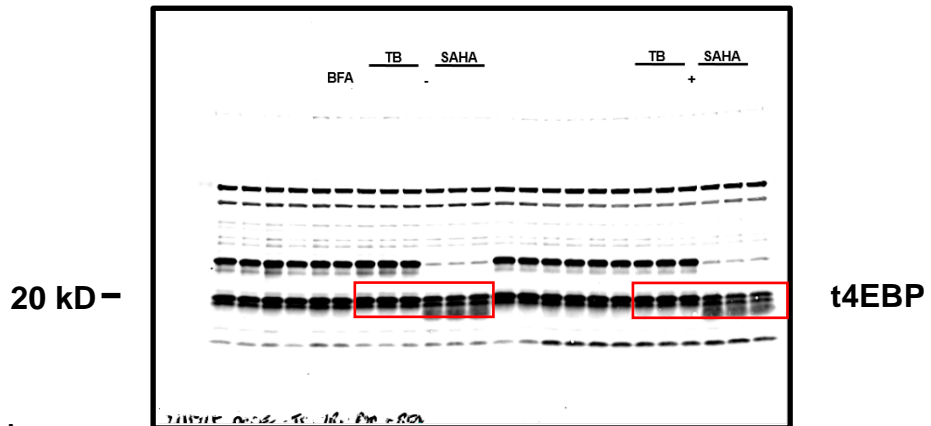

IIIB GAPDH

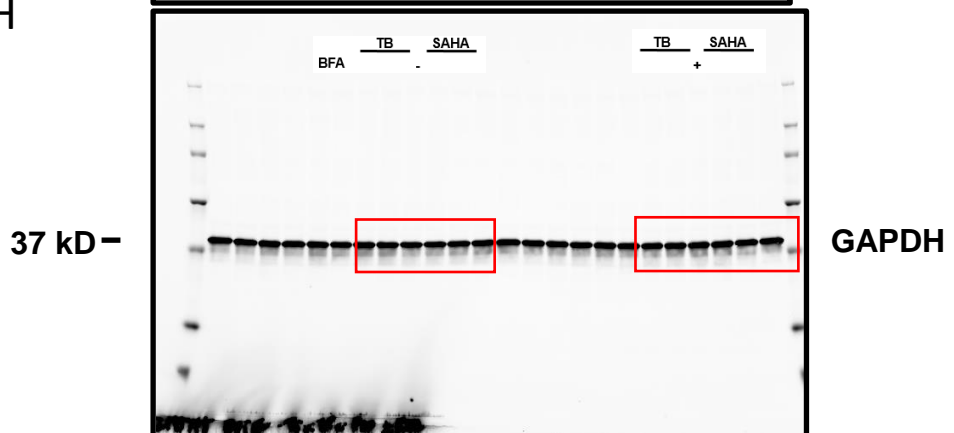

# Full unedited gel for Online Figure III continue

## IIIC LC3

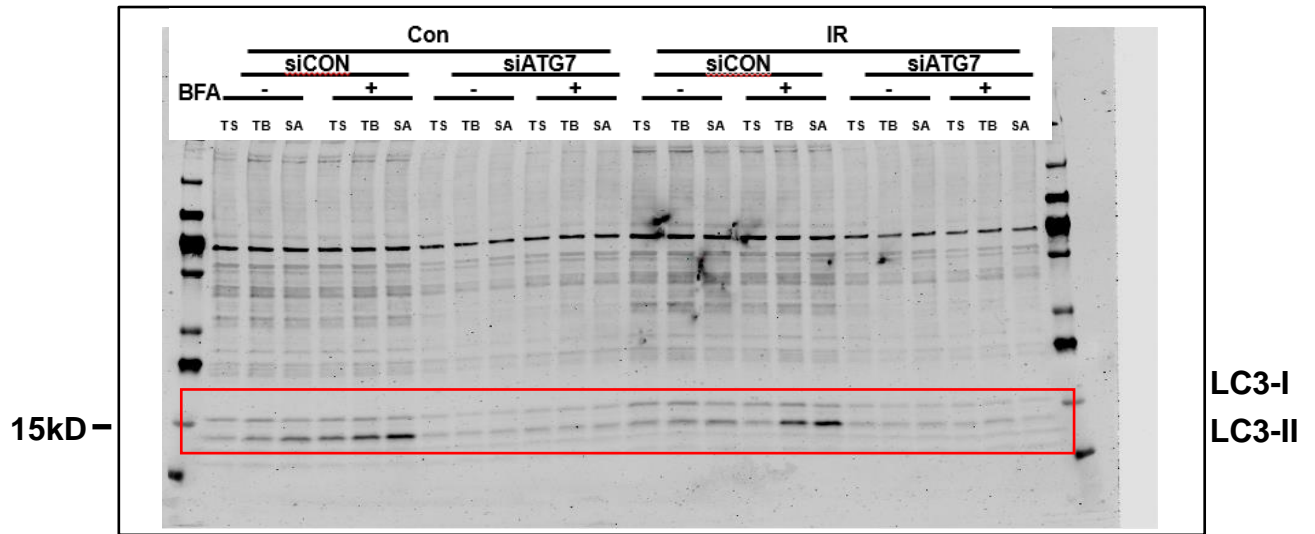

## IIIC pS6

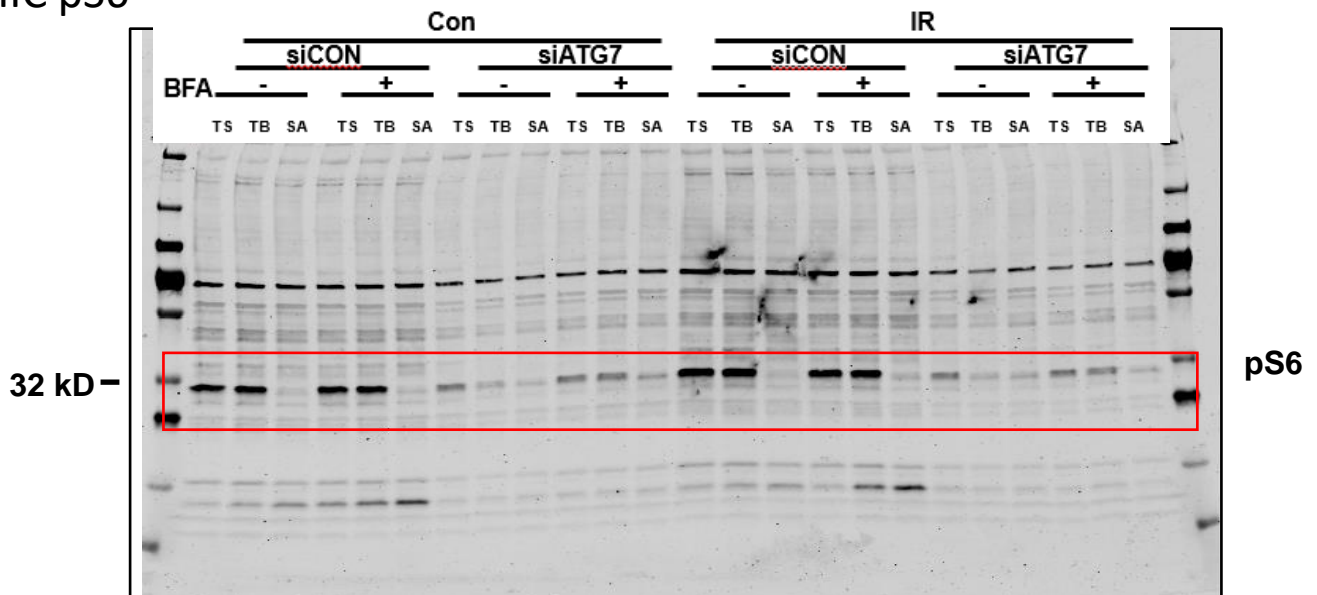



# Full unedited gel for Online Figure III continue

## IIIC p4EBP1

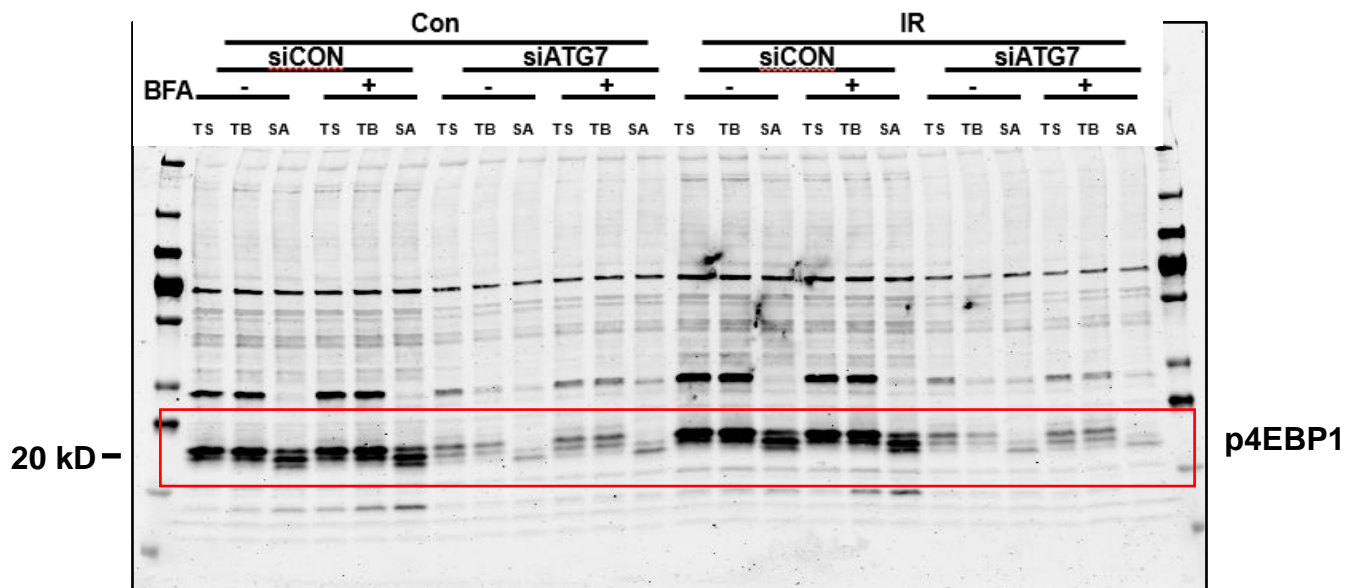

## IIIC GAPDH

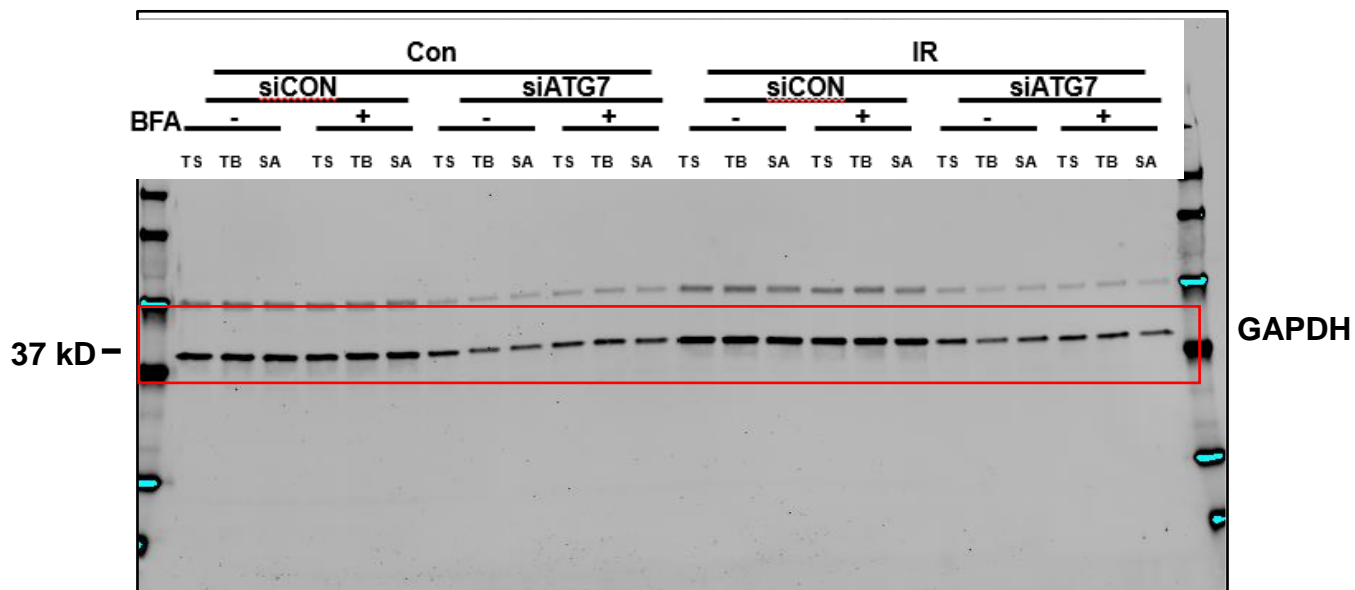

# Full unedited gel for Online Figure IV

## IVA LC3 and GAPDH

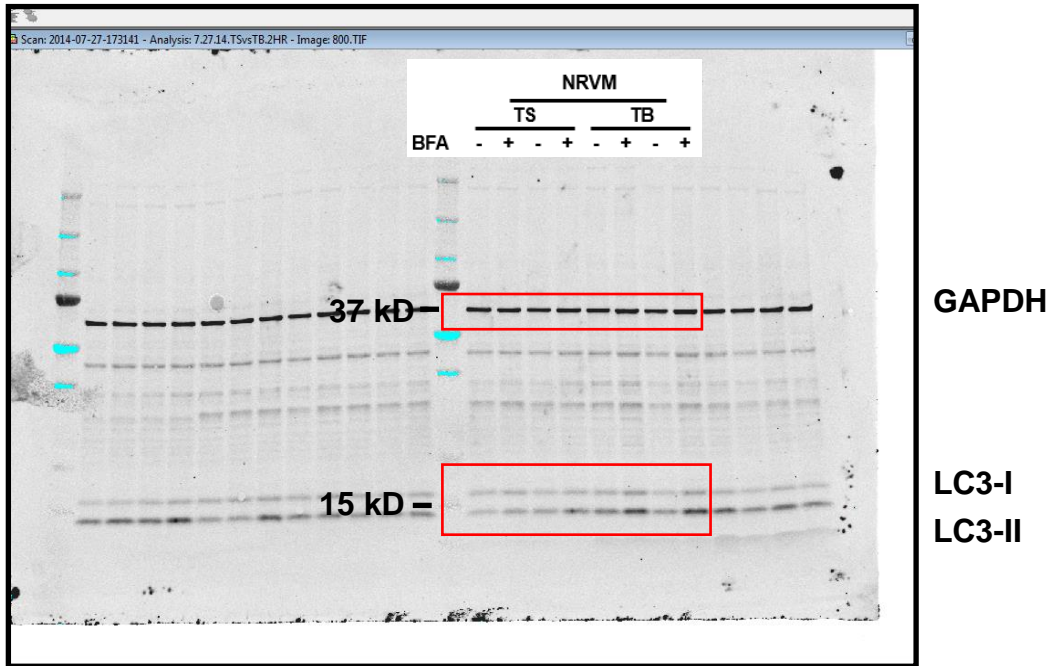

# Full unedited gel for Online Figure IV

## IVB ARVM LC3

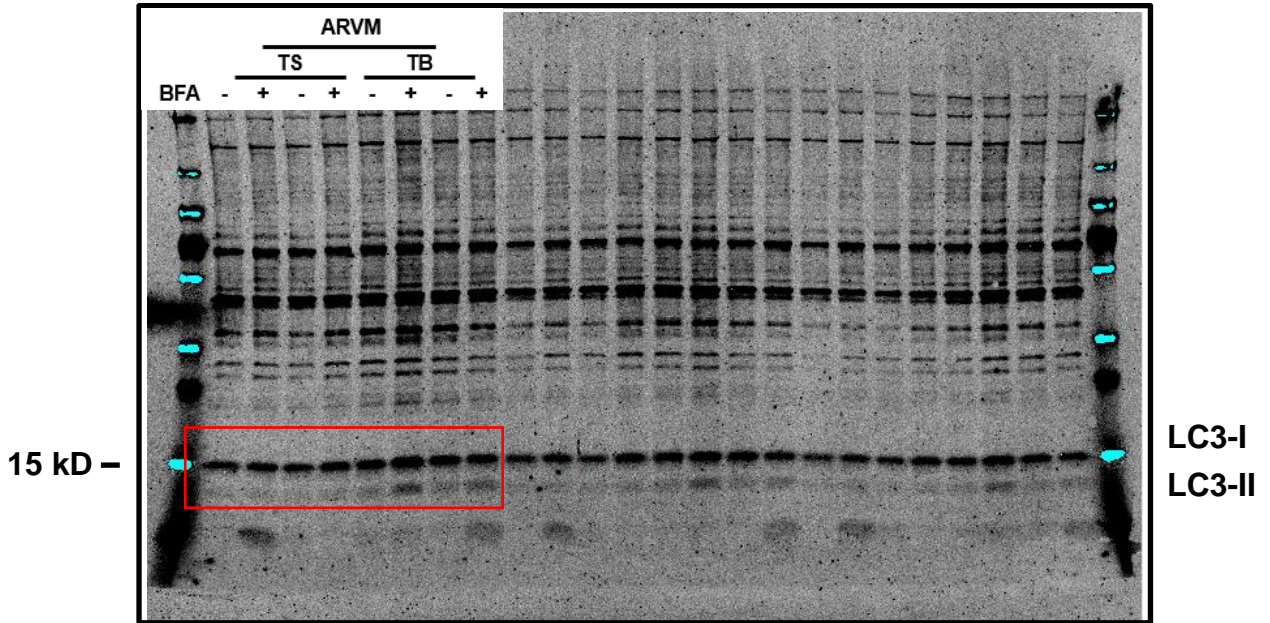

## IVB ARVM GAPDH

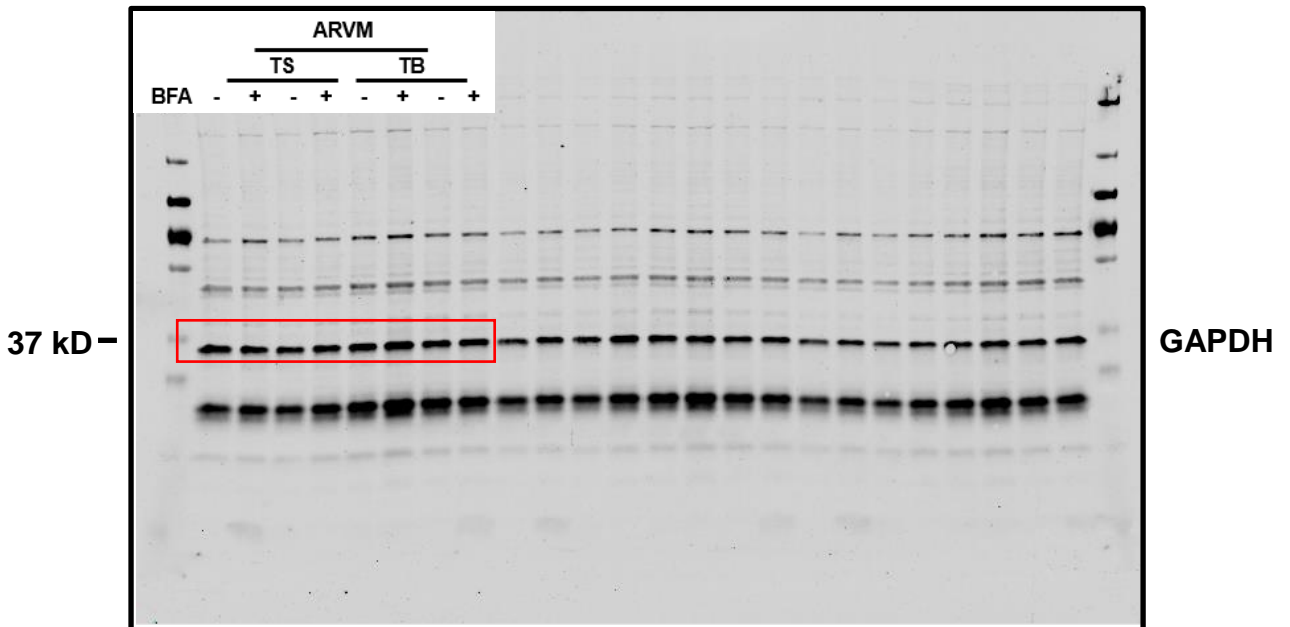

# Full unedited gel for Online Figure V

## VA LC3

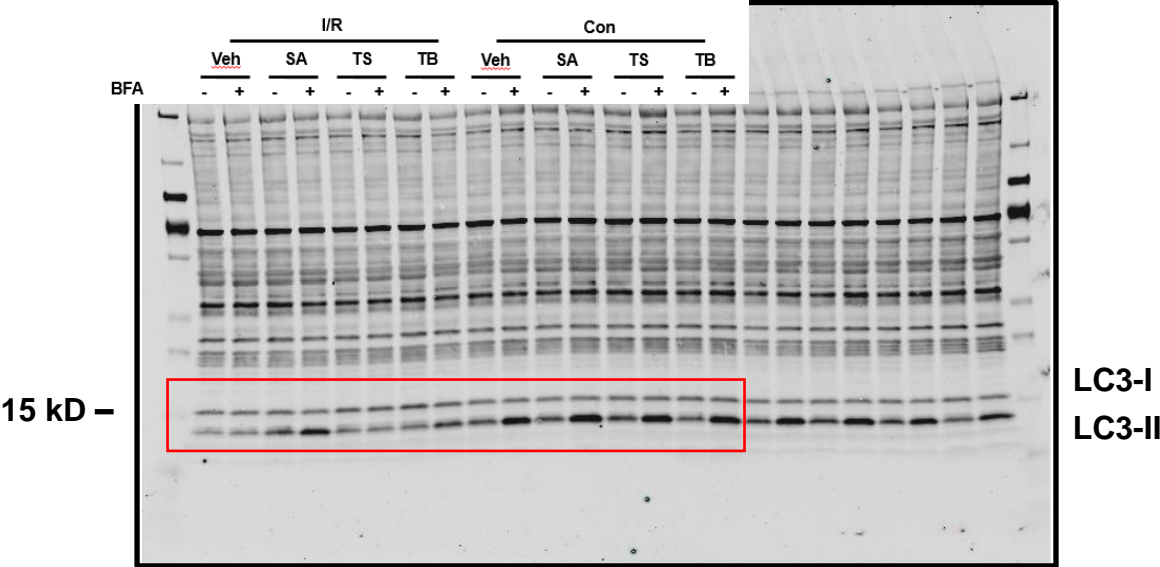

## VA GAPDH

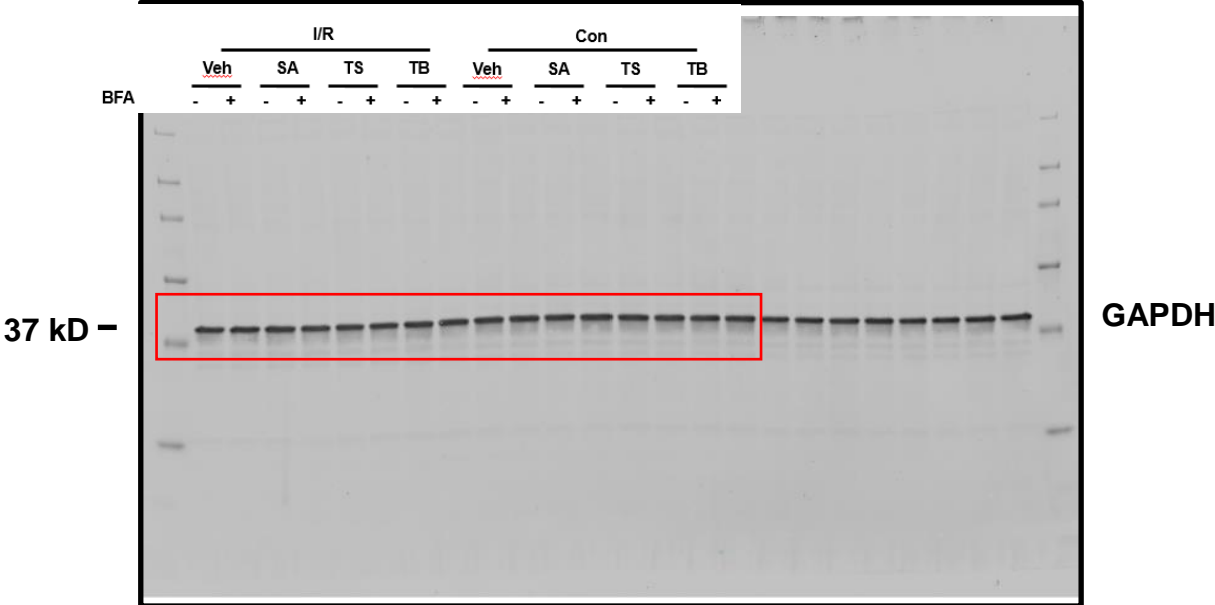

Supplement: NIHMS1714617-supplement-318601_Uncut_Gel_Blots.pdf [file NIHMS1714617-supplement-318601_Uncut_Gel_Blots.pdf]
