# Supplementary material
Source: PubMed Central journal article supplement (PMC8317428)
Supplement: NIHMS1714617-supplement-318601_Major_Resources_Table.pdf [file NIHMS1714617-supplement-318601_Major_Resources_Table.pdf]

## Major Resources Table

In order to allow validation and replication of experiments, all essential research materials listed in the Methods should be included in the Major Resources Table below. Authors are encouraged to use public repositories for protocols, data, code, and other materials and provide persistent identifiers and/or links to repositories when available. Authors may add or delete rows as needed.

### Animals (in vivo studies)

| Species                | Vendor or Source    | Background Strain | Sex  | Persistent ID / URL                                                               |
|------------------------|---------------------|-------------------|------|-----------------------------------------------------------------------------------|
| ATG7F/F mouse          | Dr. Massaki Komatsu | C57BL/6N          | Male |                                                                                   |
| C57BL/6N               | Charles River       | C57BL/6N          | Male |                                                                                   |
| $\alpha$ MHC-merCremer | Jackson Lab         | C57BL/6N          | M/F  | <a href="https://www.jax.org/strain/005657">https://www.jax.org/strain/005657</a> |

### Genetically Modified Animals

|                 | Species   | Vendor or Source | Background Strain | Other Information | Persistent ID / URL |
|-----------------|-----------|------------------|-------------------|-------------------|---------------------|
| Parent - Male   | See above |                  |                   |                   |                     |
| Parent - Female | See above |                  |                   |                   |                     |

### Antibodies

| Target antigen    | Vendor or Source                | Catalog # | Working concentration | Lot # (preferred but not required) | Persistent ID / URL                                                                                                                                                                                     |
|-------------------|---------------------------------|-----------|-----------------------|------------------------------------|---------------------------------------------------------------------------------------------------------------------------------------------------------------------------------------------------------|
| LC3               | Dr. Hill's lab Rabbit antiserum |           | 1:1000                |                                    |                                                                                                                                                                                                         |
| ATG7              | Cell Signaling                  | 2631      | 1:1000                |                                    | <a href="https://www.cellsignal.com/products/primary-antibodies/atg7-antibody/2631">https://www.cellsignal.com/products/primary-antibodies/atg7-antibody/2631</a>                                       |
| APG7 (ATG7)       | Anaspec                         | 54231     | 1:500                 |                                    | <a href="http://78.41.76.137/antibodyshop/datasheet/eurogent54231.pdf">http://78.41.76.137/antibodyshop/datasheet/eurogent54231.pdf</a>                                                                 |
| GAPDH             | Fitzgerald                      | 10R-G109a | 1:10,000              |                                    | <a href="https://www.fitzgerald-fii.com/gapdh-antibody-10r-g109a.html">https://www.fitzgerald-fii.com/gapdh-antibody-10r-g109a.html</a>                                                                 |
| Anti-DNP          | Millipore                       | S7150     | 1:1000                |                                    | <a href="https://www.emdmillipore.com/US/en/product/OxyBloProtein-Oxidation-Detection-Kit,MM_NF-S7150">https://www.emdmillipore.com/US/en/product/OxyBloProtein-Oxidation-Detection-Kit,MM_NF-S7150</a> |
| pS6(Ser235/236)   | Cell Signaling                  | 4858      | 1:1000                |                                    | <a href="https://www.cellsignal.com/">https://www.cellsignal.com/</a>                                                                                                                                   |
| pmTOR(Ser2448)    | Cell Signaling                  | 2971      | 1:1000                |                                    | <a href="https://www.cellsignal.com/">https://www.cellsignal.com/</a>                                                                                                                                   |
| mTOR              | Cell Signaling                  | 2972      | 1:1000                |                                    | <a href="https://www.cellsignal.com/">https://www.cellsignal.com/</a>                                                                                                                                   |
| p4EBP1 (Thr37/46) | Cell Signaling                  | 2855      | 1:1000                |                                    | <a href="https://www.cellsignal.com/">https://www.cellsignal.com/</a>                                                                                                                                   |
| 4EBP1             | Cell Signaling                  | 9452      | 1:1000                |                                    | <a href="https://www.cellsignal.com/">https://www.cellsignal.com/</a>                                                                                                                                   |

### DNA/cDNA Clones

| Clone Name | Sequence | Source / Repository | Persistent ID / URL |
|------------|----------|---------------------|---------------------|
| N/A        |          |                     |                     |
|            |          |                     |                     |
|            |          |                     |                     |

DOI [to be added]

**Cultured Cells**

| <b>Name</b>                             | <b>Vendor or Source</b> | <b>Sex (F, M, or unknown)</b> | <b>Persistent ID / URL</b> |
|-----------------------------------------|-------------------------|-------------------------------|----------------------------|
| Neonatal rat ventricular cardiomyocytes | Primary culture         | both                          |                            |
| Adult rat ventricular cardiomyocytes    | Primary culture         | Male                          |                            |
| Adult mouse ventricular cardiomyocytes  | Primary culture         | Male                          |                            |

**Data & Code Availability**

| <b>Description</b>        | <b>Source / Repository</b> | <b>Persistent ID / URL</b> |
|---------------------------|----------------------------|----------------------------|
| No big data is generated. |                            |                            |
|                           |                            |                            |
|                           |                            |                            |

**Other**

| <b>Description</b> | <b>Source / Repository</b> | <b>Persistent ID / URL</b> |
|--------------------|----------------------------|----------------------------|
|                    |                            |                            |
|                    |                            |                            |
|                    |                            |                            |
